# Supplementary material for: Genome-wide association study of myocardial infarction, atrial fibrillation, acute stroke, acute kidney injury and delirium after cardiac surgery – a sub-analysis of the RIPHeart-Study
Source: Springer Nature journal article supplement (doi:10.1186/s12872-019-1002-x), 2019-01-24
Supplement: MOESM1 [file 16418160]

## Synopsis

|                     |                                                                                                                                                                                                                                                                                                                                                                                                                                                                                                                                                                                                                                                                                                                                                                                                                                                                                                                                                                                                                                                                                |
|---------------------|--------------------------------------------------------------------------------------------------------------------------------------------------------------------------------------------------------------------------------------------------------------------------------------------------------------------------------------------------------------------------------------------------------------------------------------------------------------------------------------------------------------------------------------------------------------------------------------------------------------------------------------------------------------------------------------------------------------------------------------------------------------------------------------------------------------------------------------------------------------------------------------------------------------------------------------------------------------------------------------------------------------------------------------------------------------------------------|
| Title of the study  | Remote Ischaemic Preconditioning for Heart Surgery                                                                                                                                                                                                                                                                                                                                                                                                                                                                                                                                                                                                                                                                                                                                                                                                                                                                                                                                                                                                                             |
| Short Titel         | RIPHeart - Study                                                                                                                                                                                                                                                                                                                                                                                                                                                                                                                                                                                                                                                                                                                                                                                                                                                                                                                                                                                                                                                               |
| Indication          | Patients undergoing isolated on-pump coronary-artery bypass graft (CABG) surgery                                                                                                                                                                                                                                                                                                                                                                                                                                                                                                                                                                                                                                                                                                                                                                                                                                                                                                                                                                                               |
| Study design        | The study is a prospective, multicentre, randomised, controlled clinical study.                                                                                                                                                                                                                                                                                                                                                                                                                                                                                                                                                                                                                                                                                                                                                                                                                                                                                                                                                                                                |
| Primary endpoints   | <p>The primary endpoint is defined as a composite of</p> <ul style="list-style-type: none"> <li>• all-cause mortality</li> <li>• non-fatal myocardial infarction</li> <li>• any new stroke and/or</li> <li>• acute renal failure</li> </ul> <p>until hospital discharge (with a maximum of 14 days after surgery)</p>                                                                                                                                                                                                                                                                                                                                                                                                                                                                                                                                                                                                                                                                                                                                                          |
| Secondary endpoints | <ol style="list-style-type: none"> <li>1. The occurrence of any individual component of the composite endpoint at 30 days and 3 and 12 months after surgery (phone interview)</li> <li>2. The cumulative duration of invasive ventilator support (up to d30 post operation)</li> <li>3. The cumulative duration of non-invasive ventilation (up to d 30 post operation)</li> <li>4. Length of stay on the intensive care (ICU)</li> <li>5. Need of catecholamines</li> <li>6. Total hospital stay</li> <li>7. Troponin T (preoperative, 6, 12, 24, and 48 h after surgery)</li> <li>8. Troponin I (preoperative, 6,12, 24, and 48 h after surgery)</li> <li>9. Renal function</li> <li>10. Vasopressor and inotropic support (yes/ no)</li> <li>11. New onset of atrial fibrillation</li> <li>12. Incidence of postoperative delirium within 4 days after surgery (yes/no)</li> <li>13. Use of any delirium medication within 4 days after surgery (yes/no)</li> <li>14. Use of any cardiac assist devices intraoperative and postoperative within 30 days (yes/no)</li> </ol> |
| Sample size         | N= 2070 patients, N=1035 per group                                                                                                                                                                                                                                                                                                                                                                                                                                                                                                                                                                                                                                                                                                                                                                                                                                                                                                                                                                                                                                             |
| Study population    | <p><u>Key inclusion criteria:</u></p> <ul style="list-style-type: none"> <li>▪ patients <math>\geq</math> 18 years</li> <li>▪ on-pump isolated coronary-artery bypass graft (CABG) surgery</li> <li>▪ Informed consent</li> </ul> <p><u>Key exclusion criteria:</u></p> <ul style="list-style-type: none"> <li>▪ Off-pump procedure</li> <li>▪ concomitant diagnosis (e.g., ejection fraction <math>&lt;</math>30%, diabetes mellitus, Instable angina pectoris, increased baseline troponin concentration; dialysis)</li> <li>▪ nicorandil and/or sulfonyleurea and/or P2Y<sub>12</sub> platelet receptor inhibitors</li> <li>▪ pregnancy</li> </ul>                                                                                                                                                                                                                                                                                                                                                                                                                          |
| Interventions       | <u>Experimental intervention:</u> RIPC will be induced prior to skin incision by 4 cycles of upper limb ischaemia (5 min blood pressure cuff inflations to a pressure of at least 220 mmHg and 5 min cuff deflations).                                                                                                                                                                                                                                                                                                                                                                                                                                                                                                                                                                                                                                                                                                                                                                                                                                                         |

|                      |                                                                                                                                                                                                                                                                                                                                                                                                                                                                                                                                                                                                                                                                                                                                                                                                                                                                                                                                                                                                                                                                                                                                                                                                                                                                                                                                                                                                                            |
|----------------------|----------------------------------------------------------------------------------------------------------------------------------------------------------------------------------------------------------------------------------------------------------------------------------------------------------------------------------------------------------------------------------------------------------------------------------------------------------------------------------------------------------------------------------------------------------------------------------------------------------------------------------------------------------------------------------------------------------------------------------------------------------------------------------------------------------------------------------------------------------------------------------------------------------------------------------------------------------------------------------------------------------------------------------------------------------------------------------------------------------------------------------------------------------------------------------------------------------------------------------------------------------------------------------------------------------------------------------------------------------------------------------------------------------------------------|
|                      | <p><u>Control interventions:</u></p> <p>Sham-RIPC will be induced by 4 cycles of ‘pseudo’-ischaemia (5 min blood-pressure cuff inflations to a pressure of at least 220 mmHg and 5 min cuff deflations) using a dummy arm, under Sevoflurane based anaesthesia</p> <p><u>Duration of intervention per patient:</u> 40 minutes</p> <p><u>Follow-up per patient:</u> Discharge, 30 days, month 3, 6 and 12 after surgery</p>                                                                                                                                                                                                                                                                                                                                                                                                                                                                                                                                                                                                                                                                                                                                                                                                                                                                                                                                                                                                 |
| Statistical Analysis | <p><u>Efficacy:</u> The primary endpoints AUC of cTnT and AKI will be compared in the following way: Firstly, the experimental arm (RIPC group) will be compared with the Sham-RIPC arm. Secondly, if results are significant for at least one of the two co-primary endpoints, the experimental arm will be compared with the RIPC/Propofol arm for the two primary endpoints. Group comparisons will be tested using appropriate 2 sample tests (t-test in case of normal distribution or Wilcoxon-Mann-Whitney test otherwise for AUC of cTnT) and the <math>\chi^2</math>-test for AKI.</p> <p><u>Description of the primary efficacy analysis and population:</u> Tests will be two-sided using Bonferroni-corrected significance levels of alpha = 2.5 % to account for the two primary endpoints. Power estimation bases on a power of 95 % for the comparisons of RIPC vs. Sham-RIP. All patients with available co-primary endpoints will be included in the analysis population.</p> <p><u>Safety:</u> Safety data on RIPC will be evaluated descriptively and summarised by treatment arm, including all recruited study patients (safety population).</p> <p><u>Secondary endpoints</u> will be compared between the treatment arms with t-tests, Wilcoxon-Mann-Whitney tests, <math>\chi^2</math>-tests and log-rank test. Furthermore, appropriate regression models will be used for adjusted analysis.</p> |
