# Supplementary material for: Genome-wide association study of myocardial infarction, atrial fibrillation, acute stroke, acute kidney injury and delirium after cardiac surgery – a sub-analysis of the RIPHeart-Study
Source: Springer Nature journal article supplement (doi:10.1186/s12872-019-1002-x), 2019-01-24
Supplement: MOESM3 [file 16418160]

|                 |        |                                |    |
|-----------------|--------|--------------------------------|----|
| DEATH           | 9      | yes, tumour                    | 11 |
| DEATH           | 10     | yes, cerebrovascular accident  | 29 |
| DEATH           | 11     | yes, pulmonary embolism        | 23 |
| DEATH           | 12     | yes, other non-cardiac         | 22 |
| DEATH           | 13     | yes, other non-cardiac ?       | 24 |
| DEATH           | 14     | yes, unknown cause             | 18 |
| MI              | -99    | unknown                        | 7  |
| MI              | -88    | inconsistencies???             | 18 |
| MI              | 0      | no                             | 2  |
| MI              | 1      | yes, <=72h by Troponin + Angio | 30 |
| MI              | 10     | yes, <=72h by Troponin + Echo  | 29 |
| MI              | 10000  | yes, > 72h postoperative       | 24 |
| MI              | 100000 | yes, according to autopsy      | 25 |
| STROKE          | -99    | unknown                        | 7  |
| STROKE          | -88    | inconsistencies???             | 18 |
| STROKE          | 0      | no                             | 2  |
| STROKE          | 1      | yes, in hospital               | 16 |
| STROKE          | 10     | yes, after discharge           | 20 |
| STROKE          | 100    | yes, according to autopsy      | 25 |
| RENFAL          | -99    | unknown                        | 7  |
| RENFAL          | -88    | inconsistencies???             | 18 |
| RENFAL          | 0      | no                             | 2  |
| RENFAL          | 1      | yes, max creatinine            | 19 |
| RENFAL          | 10     | yes, urine output              | 17 |
| RENFAL          | 100    | yes, RRT                       | 8  |
| RENFAL          | 101    | yes, RRT + max creatinine      | 25 |
| RENFAL          | 110    | yes, RRT + urine output        | 23 |
| RENFAL          | 1000   | yes, according to autopsy      | 25 |
| AFF             | 0      | no new AFF                     | 10 |
| AFF             | 1      | new AFF                        | 7  |
| AFF             | 2      | preexisting AFF                | 13 |
| DELIR           | -99    | not evaluable                  | 15 |
| DELIR           | 0      | no                             | 2  |
| DELIR           | 1      | yes                            | 3  |
| OPDURCH         | 1      | CABG (alone)                   | 12 |
| OPDURCH         | 5      | Combined procedures            | 19 |
| OPDURCH         | 6      | Other type of surgery (alone)  | 29 |
| RFLE            | 1      | No impairment                  | 14 |
| RFLE            | 2      | Risk                           | 4  |
| RFLE            | 3      | Injury                         | 6  |
| RFLE            | 4      | Failure                        | 7  |
| RFLE            | 99     | unknown                        | 7  |
| Wundinf         | 0      | no                             | 2  |
| Wundinf         | 1      | yes                            | 3  |
| SEPSIS_KP       | 0      | no                             | 2  |
| SEPSIS_KP       | 1      | yes                            | 3  |
| REA_KP          | 0      | no                             | 2  |
| REA_KP          | 1      | yes                            | 3  |
| ReThorak        | 0      | no                             | 2  |
| ReThorak        | 1      | yes                            | 3  |
| AssisDevice_ICU | 0      | no                             | 2  |
| AssisDevice_ICU | 1      | yes                            | 3  |
| DELIRMED        | 0      | no                             | 2  |
| DELIRMED        | 1      | yes                            | 3  |
