# Supplementary material for: Genome-wide association study of myocardial infarction, atrial fibrillation, acute stroke, acute kidney injury and delirium after cardiac surgery – a sub-analysis of the RIPHeart-Study
Source: Springer Nature journal article supplement (doi:10.1186/s12872-019-1002-x), 2019-01-24
Supplement: MOESM4 [file 16418160]

AFF

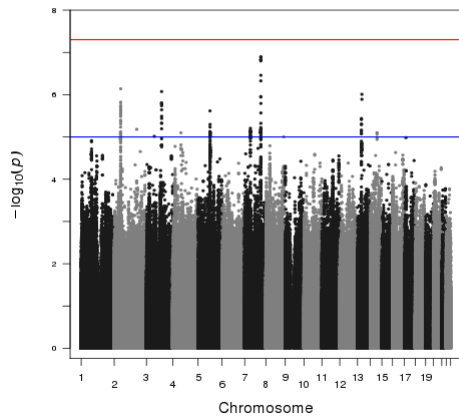

DELIR

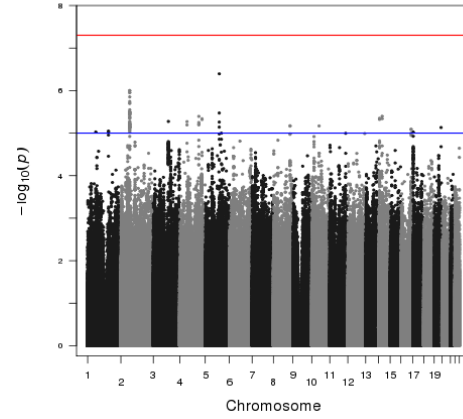

MI

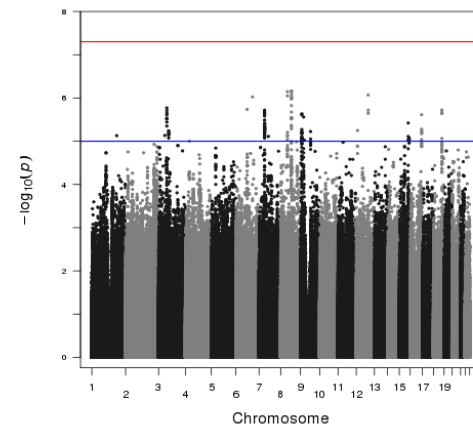

RENFAIL

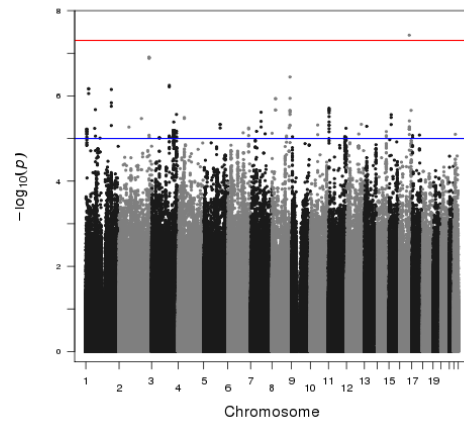

STROKE

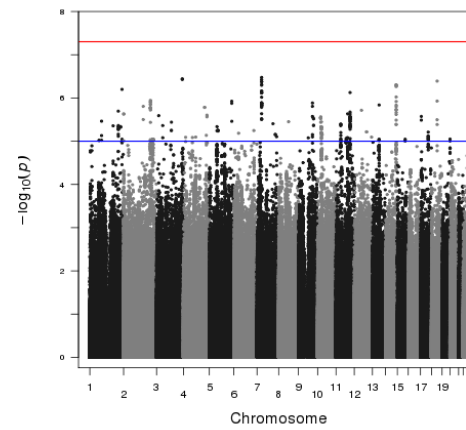

S1 Fig a

AFF

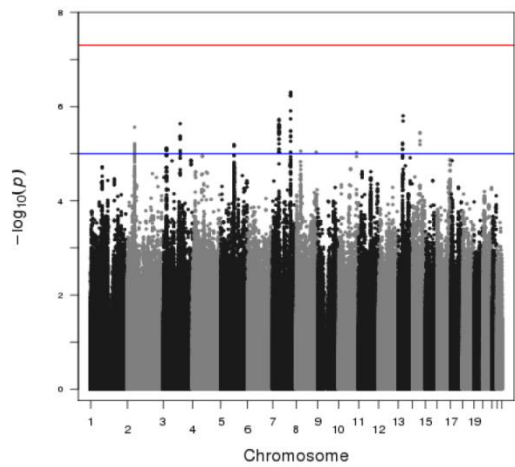

DELIR

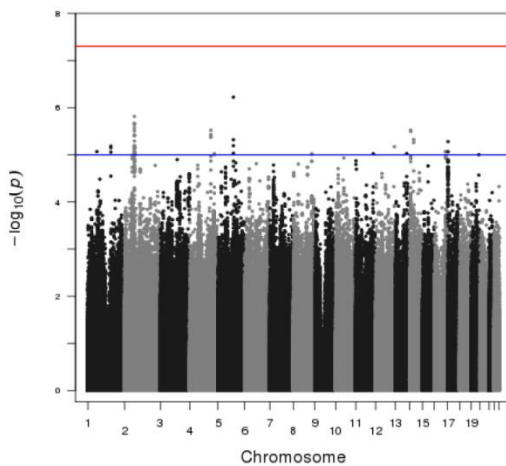

MI

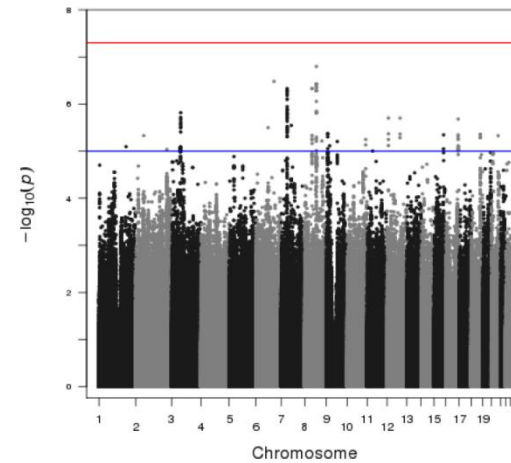

RENFAIL

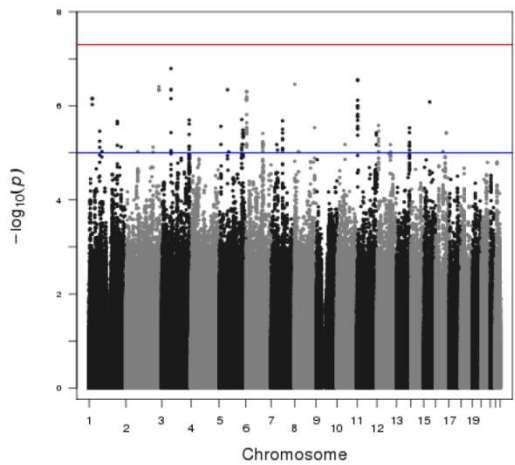

STROKE

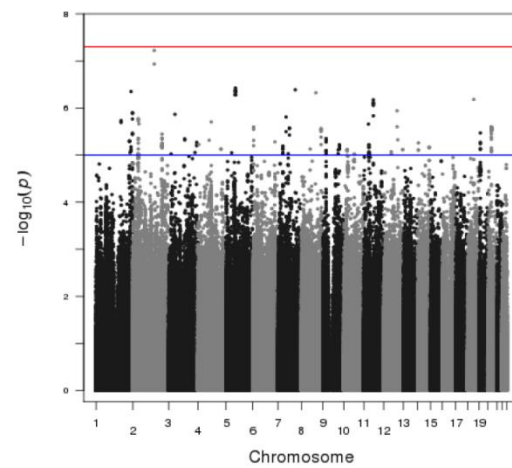

ALL

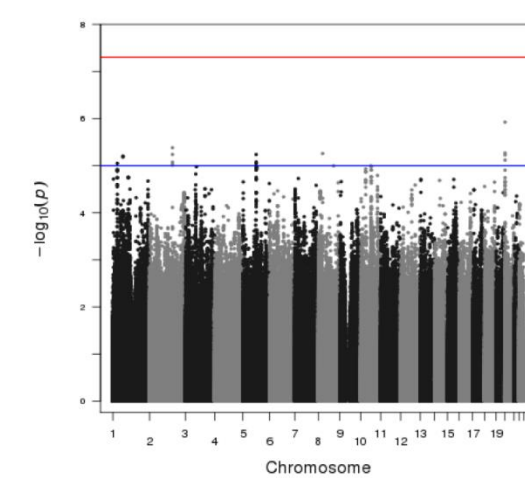

S1 Fig b
