# Supplementary material for: Genome-wide association study of myocardial infarction, atrial fibrillation, acute stroke, acute kidney injury and delirium after cardiac surgery – a sub-analysis of the RIPHeart-Study
Source: BMC Cardiovasc Disord. 2019 Jan 24;19:26. doi: 10.1186/s12872-019-1002-x (PMC6345037; doi:10.1186/s12872-019-1002-x)
Supplement: Supplementary file 6 — Table S2. Complete table of SNPs reaching the predefined threshold of p < 1 × 10− 5 with and without adjustment for all other complications. (PDF 1177 kb) [file 12872_2019_1002_MOESM6_ESM.pdf]

Table S2

Adjusted for all other outcomes

| CHR | SNP            | BP        | A1 | A2 | FRQ  | P        | OR_L95 | OR_U95 | gene                       | conseq                                                                                 | genotyped | impute2.info |
|-----|----------------|-----------|----|----|------|----------|--------|--------|----------------------------|----------------------------------------------------------------------------------------|-----------|--------------|
| 7   | rs17512172     | 121198154 | T  | A  | 0.67 | 1.27e-07 | 0.43   | 0.68   | -                          | intergenic_variant                                                                     | 0         | 0.997        |
| 2   | rs7557600      | 48772202  | T  | C  | 0.83 | 7.25e-07 | 0.37   | 0.65   | STON1, STON1-GTF2A1L, -    | intron_variant, regulatory_region_variant                                              | 0         | 0.997        |
| 3   | rs115155878    | 114055988 | A  | C  | 0.97 | 8.45e-07 | 0.11   | 0.39   | ZBTB20                     | downstream_gene_variant                                                                | 0         | 0.991        |
| 13  | rs9563027      | 51708406  | T  | C  | 0.69 | 9.82e-07 | 0.45   | 0.71   | LINC00371                  | intron_variant, non_coding_transcript_variant                                          | 0         | 0.978        |
| 5   | rs4574581      | 89925895  | G  | A  | 0.34 | 2.43e-06 | 0.42   | 0.70   | GPR98                      | intron_variant                                                                         | 0         | 0.984        |
| 13  | rs1974039      | 48475331  | G  | A  | 0.61 | 3.67e-06 | 0.48   | 0.74   | LINC00444                  | downstream_gene_variant                                                                | 0         | 0.998        |
| 5   | rs77190517     | 90216068  | C  | T  | 0.96 | 5.06e-06 | 0.20   | 0.52   | GPR98                      | intron_variant                                                                         | 0         | 0.992        |
| 2   | rs58835962     | 48328813  | G  | C  | 0.88 | 5.86e-06 | 0.37   | 0.67   | AC079807.4                 | intron_variant, non_coding_transcript_variant                                          | 0         | 0.994        |
| 7   | rs4442037      | 42559895  | C  | G  | 0.27 | 6.25e-06 | 1.35   | 2.12   | -                          | intergenic_variant                                                                     | 0         | 0.993        |
| 14  | rs150942       | 70542102  | G  | A  | 0.34 | 7.93e-06 | 0.43   | 0.72   | SLC8A3                     | intron_variant, intron_variant, NMD_transcript_variant                                 | 0         | 0.961        |
| 4   | rs1551049      | 62105676  | A  | G  | 0.67 | 7.95e-06 | 1.38   | 2.28   | LPHN3                      | intron_variant, intron_variant, non_coding_transcript_variant                          | 0         | 0.969        |
| 3   | rs115978432    | 58525210  | C  | A  | 0.99 | 9.69e-06 | 0.06   | 0.34   | ACOX2                      | upstream_gene_variant                                                                  | 0         | 0.993        |
| 8   | rs58527822     | 134785991 | C  | T  | 0.92 | 9.94e-06 | 0.29   | 0.62   | CTD-2588J1.1, CTD-2309H9.3 | intron_variant, non_coding_transcript_variant, downstream_gene_variant                 | 0         | 0.971        |
| 5   | rs10051505     | 105009840 | T  | C  | 0.92 | 4.03e-07 | 0.14   | 0.42   | -                          | intergenic_variant                                                                     | 0         | 0.975        |
| 2   | rs13008718     | 65961565  | G  | T  | 0.56 | 9.99e-07 | 0.33   | 0.62   | AC074391.1, RP11-340F16.1  | intron_variant, non_coding_transcript_variant, downstream_gene_variant                 | 0         | 0.986        |
| 14  | rs188623516    | 46926170  | T  | A  | 0.99 | 4.02e-06 | 0.00   | 0.10   | LINC00871                  | intron_variant, non_coding_transcript_variant                                          | 0         | 0.998        |
| 4   | chr4:142710442 | 142710442 | C  | A  | 0.70 | 4.04e-06 | 1.64   | 3.36   | -                          | intergenic_variant                                                                     | 2         | 1            |
| 14  | rs73591732     | 27448446  | T  | C  | 0.90 | 4.48e-06 | 0.23   | 0.56   | RP11-384J4.2               | intron_variant, non_coding_transcript_variant                                          | 0         | 0.998        |
| 4   | rs10015432     | 166855253 | T  | C  | 0.90 | 4.59e-06 | 0.21   | 0.53   | TLL1                       | intron_variant, intron_variant, NMD_transcript_variant                                 | 0         | 0.957        |
| 3   | rs74888047     | 112614048 | C  | A  | 0.99 | 5.32e-06 | 0.02   | 0.20   | -                          | intergenic_variant                                                                     | 0         | 0.999        |
| 4   | rs4864785      | 54394410  | C  | T  | 0.77 | 5.37e-06 | 1.81   | 4.39   | LNX1-AS1, LNX1, FIP1L1     | intron_variant, non_coding_transcript_variant, intron_variant, downstream_gene_variant | 0         | 0.947        |
| 8   | rs13281094     | 124741789 | T  | C  | 0.64 | 6.71e-06 | 0.35   | 0.66   | ANXA13, -                  | upstream_gene_variant, intron_variant, regulatory_region_variant                       | 0         | 0.98         |
| 10  | rs78696618     | 55268813  | G  | A  | 1.00 | 6.78e-06 | 0.00   | 0.08   | -                          | intergenic_variant                                                                     | 0         | 0.998        |
| 19  | rs192196148    | 51983352  | G  | C  | 1.00 | 7.39e-06 | 0.00   | 0.09   | CEACAM18, -                | intron_variant, regulatory_region_variant                                              | 0         | 0.999        |
| 16  | rs9922610      | 76512728  | G  | A  | 0.99 | 8.11e-06 | 0.01   | 0.18   | CNTNAP4                    | intron_variant, non_coding_transcript_variant, intron_variant                          | 0         | 1            |

|    |             |           |   |   |      |          |      |      |                             |                                                                                                        |   |       |
|----|-------------|-----------|---|---|------|----------|------|------|-----------------------------|--------------------------------------------------------------------------------------------------------|---|-------|
| 1  | rs74634803  | 156207690 | G | C | 0.99 | 9.00e-06 | 0.03 | 0.25 | PMF1, PMF1-BGLAP, BGLAP     | intron_variant, downstream_gene_variant, intron_variant, NMD_transcript_variant, upstream_gene_variant | 0 | 0.993 |
| 1  | rs180991369 | 61102621  | G | A | 0.97 | 9.41e-06 | 0.08 | 0.37 | RP11-776H12.1               | intron_variant, non_coding_transcript_variant                                                          | 0 | 0.987 |
| 17 | rs4362428   | 2090341   | C | A | 0.60 | 9.46e-06 | 0.37 | 0.68 | SMG6                        | intron_variant                                                                                         | 0 | 0.997 |
| 8  | rs13275931  | 79168795  | C | T | 0.92 | 6.96e-07 | 0.21 | 0.51 | -                           | intergenic_variant                                                                                     | 0 | 0.995 |
| 8  | rs7819484   | 49778212  | T | C | 0.96 | 7.16e-07 | 0.12 | 0.39 | -                           | intergenic_variant                                                                                     | 0 | 0.986 |
| 12 | rs6538067   | 87650216  | G | T | 0.12 | 8.55e-07 | 1.84 | 4.08 | -                           | intergenic_variant                                                                                     | 0 | 0.988 |
| 6  | rs144756202 | 122373287 | A | G | 0.98 | 9.44e-07 | 0.08 | 0.34 | -                           | intergenic_variant                                                                                     | 0 | 0.989 |
| 3  | rs727476    | 60316417  | G | T | 0.53 | 1.70e-06 | 0.33 | 0.63 | FHIT                        | intron_variant                                                                                         | 0 | 0.994 |
| 6  | rs193051711 | 82737197  | C | T | 0.99 | 1.84e-06 | 0.02 | 0.18 | -                           | intergenic_variant                                                                                     | 0 | 0.999 |
| 7  | rs9690969   | 40541259  | T | C | 0.82 | 1.91e-06 | 0.31 | 0.61 | SUGCT                       | intron_variant, downstream_gene_variant                                                                | 0 | 0.997 |
| 18 | rs79164706  | 61879513  | G | A | 0.97 | 1.91e-06 | 0.12 | 0.42 | RP11-909B2.1, RP11-146N18.1 | downstream_gene_variant, intron_variant, non_coding_transcript_variant                                 | 0 | 0.997 |
| 16 | rs17750019  | 83277510  | A | G | 0.89 | 2.43e-06 | 0.23 | 0.54 | CDH13                       | intron_variant, NMD_transcript_variant, intron_variant, intron_variant, non_coding_transcript_variant  | 0 | 0.977 |
| 9  | rs4298578   | 22834741  | T | A | 0.96 | 2.76e-06 | 0.12 | 0.42 | -                           | intergenic_variant                                                                                     | 0 | 0.995 |
| 15 | rs191166845 | 87015139  | T | C | 0.99 | 3.78e-06 | 0.04 | 0.26 | AGBL1                       | intron_variant                                                                                         | 0 | 0.999 |
| 3  | rs59137280  | 74071304  | A | G | 0.91 | 5.76e-06 | 0.25 | 0.58 | -                           | intergenic_variant                                                                                     | 0 | 0.987 |
| 9  | rs4744652   | 74639028  | T | C | 0.15 | 5.98e-06 | 1.60 | 3.27 | -                           | intergenic_variant                                                                                     | 0 | 0.995 |
| 16 | rs117092646 | 85199964  | A | G | 0.98 | 6.25e-06 | 0.10 | 0.40 | CTC-786C10.1                | upstream_gene_variant                                                                                  | 0 | 0.996 |
| 1  | rs115246628 | 183787321 | C | T | 1.00 | 7.44e-06 | 0.01 | 0.14 | RGL1                        | intron_variant                                                                                         | 0 | 0.998 |
| 7  | rs74476624  | 67956247  | G | C | 0.97 | 7.76e-06 | 0.12 | 0.44 | -                           | intergenic_variant                                                                                     | 0 | 0.996 |
| 15 | rs74317074  | 94177001  | A | G | 0.99 | 8.47e-06 | 0.04 | 0.30 | RP11-739G5.1                | intron_variant, non_coding_transcript_variant                                                          | 0 | 0.999 |
| 9  | rs147007521 | 28306823  | G | C | 0.96 | 9.43e-06 | 0.15 | 0.48 | LINGO2                      | intron_variant                                                                                         | 0 | 0.989 |
| 4  | rs112955975 | 29332523  | T | G | 0.96 | 9.95e-06 | 0.18 | 0.51 | -                           | intergenic_variant                                                                                     | 0 | 0.996 |
| 16 | rs78064607  | 71723181  | C | T | 0.99 | 3.77e-08 | 0.01 | 0.09 | PHLPP2                      | intron_variant, intron_variant, non_coding_transcript_variant, upstream_gene_variant                   | 0 | 0.997 |
| 2  | rs184936958 | 224157963 | C | T | 1.00 | 1.23e-07 | 0.00 | 0.05 | -                           | intergenic_variant                                                                                     | 0 | 0.999 |
| 8  | rs189437718 | 134655419 | A | G | 0.99 | 3.60e-07 | 0.01 | 0.15 | SNORA40                     | downstream_gene_variant                                                                                | 0 | 0.996 |
| 1  | rs72654815  | 21354625  | G | A | 0.97 | 6.79e-07 | 0.05 | 0.27 | EIF4G3, -                   | intron_variant, regulatory_region_variant                                                              | 0 | 0.987 |
| 1  | rs113318533 | 191203487 | C | A | 0.96 | 7.08e-07 | 0.08 | 0.33 | -                           | intergenic_variant                                                                                     | 0 | 0.992 |
| 8  | rs143062081 | 26797906  | G | A | 0.98 | 1.16e-06 | 0.05 | 0.27 | -                           | intergenic_variant                                                                                     | 0 | 0.988 |
| 11 | rs139967808 | 4503396   | G | A | 0.99 | 1.95e-06 | 0.01 | 0.17 | -                           | regulatory_region_variant, intergenic_variant                                                          | 0 | 0.997 |
| 1  | rs76487613  | 72134192  | T | A | 0.99 | 2.10e-06 | 0.03 | 0.22 | NEGR1, -                    | intron_variant, regulatory_region_variant                                                              | 0 | 0.996 |
| 16 | rs72801516  | 84969387  | A | G | 0.66 | 2.19e-06 | 0.21 | 0.53 | RP11-254F19.3               | intron_variant, non_coding_transcript_variant                                                          | 0 | 0.941 |

|    |                 |           |   |   |      |          |      |       |                                             |                                                                                                                                                                                                                            |   |       |
|----|-----------------|-----------|---|---|------|----------|------|-------|---------------------------------------------|----------------------------------------------------------------------------------------------------------------------------------------------------------------------------------------------------------------------------|---|-------|
| 7  | rs117208670     | 77885127  | T | C | 0.98 | 2.42e-06 | 0.04 | 0.26  | MAGI2                                       | 3_prime_UTR_variant, intron_variant, non_coding_transcript_variant, intron_variant                                                                                                                                         | 0 | 0.994 |
| 15 | rs188722224     | 38535852  | C | T | 0.99 | 2.76e-06 | 0.01 | 0.16  | -                                           | intergenic_variant                                                                                                                                                                                                         | 0 | 0.998 |
| 4  | rs10212651      | 46543306  | A | G | 1.00 | 3.22e-06 | 0.00 | 0.11  | -                                           | intergenic_variant                                                                                                                                                                                                         | 0 | 0.998 |
| 2  | rs140459083     | 166887177 | C | G | 0.99 | 3.40e-06 | 0.03 | 0.22  | AC010127.3, SCN1A                           | intron_variant, non_coding_transcript_variant, intron_variant                                                                                                                                                              | 0 | 0.997 |
| 16 | rs140394213     | 72499282  | G | A | 0.99 | 3.87e-06 | 0.01 | 0.15  | AC004158.2                                  | intron_variant, non_coding_transcript_variant                                                                                                                                                                              | 0 | 1     |
| 3  | rs140332909     | 164997469 | C | T | 1.00 | 4.11e-06 | 0.00 | 0.05  | RP11-85M11.2                                | intron_variant, non_coding_transcript_variant                                                                                                                                                                              | 0 | 0.999 |
| 12 | chr12:110925718 | 110925718 | A | G | 0.99 | 4.64e-06 | 0.03 | 0.23  | FAM216A, VPS29                              | non_coding_transcript_exon_variant, non_coding_transcript_variant, downstream_gene_variant, missense_variant                                                                                                               | 2 | 1     |
| 5  | rs192526962     | 123429995 | A | G | 1.00 | 4.67e-06 | 0.00 | 0.09  | -                                           | intergenic_variant                                                                                                                                                                                                         | 0 | 0.999 |
| 10 | rs191017384     | 54876442  | C | T | 1.00 | 4.83e-06 | 0.01 | 0.12  | -                                           | intergenic_variant                                                                                                                                                                                                         | 0 | 1     |
| 13 | rs111697328     | 36720672  | T | C | 0.93 | 5.18e-06 | 0.13 | 0.44  | -                                           | intergenic_variant                                                                                                                                                                                                         | 0 | 0.964 |
| 2  | rs147332456     | 73467224  | C | G | 0.99 | 5.41e-06 | 0.01 | 0.15  | CCT7, -                                     | upstream_gene_variant, intron_variant, intron_variant, NMD_transcript_variant, intron_variant, non_coding_transcript_variant, non_coding_transcript_exon_variant, non_coding_transcript_variant, regulatory_region_variant | 0 | 0.998 |
| 6  | rs9478662       | 155912941 | A | G | 0.99 | 5.67e-06 | 0.03 | 0.25  | -                                           | intergenic_variant                                                                                                                                                                                                         | 0 | 0.999 |
| 11 | rs11222654      | 131333844 | G | A | 0.99 | 5.75e-06 | 0.01 | 0.18  | NTM                                         | intron_variant, non_coding_transcript_variant, intron_variant                                                                                                                                                              | 0 | 0.999 |
| 1  | rs114460275     | 7552998   | C | T | 0.98 | 6.04e-06 | 0.05 | 0.30  | CAMTA1                                      | intron_variant                                                                                                                                                                                                             | 0 | 0.998 |
| 7  | rs193083142     | 43997164  | G | A | 1.00 | 6.79e-06 | 0.00 | 0.08  | RP5-1165K10.2, UBE2D4, AC004985.12, POLR2J4 | intron_variant, non_coding_transcript_variant, downstream_gene_variant                                                                                                                                                     | 0 | 1     |
| 14 | rs57562323      | 87276346  | T | C | 0.91 | 6.89e-06 | 0.16 | 0.48  | -                                           | intergenic_variant                                                                                                                                                                                                         | 0 | 0.991 |
| 6  | rs58258587      | 114638966 | C | T | 0.94 | 7.35e-06 | 0.12 | 0.44  | HS3ST5, RP3-399L15.3                        | intron_variant, non_coding_transcript_variant                                                                                                                                                                              | 0 | 0.978 |
| 8  | rs143497687     | 1256659   | T | C | 0.99 | 7.53e-06 | 0.01 | 0.19  | -                                           | intergenic_variant                                                                                                                                                                                                         | 0 | 0.998 |
| 7  | rs73193454      | 108223617 | T | A | 0.98 | 7.77e-06 | 0.05 | 0.31  | -                                           | intergenic_variant                                                                                                                                                                                                         | 0 | 0.988 |
| 12 | rs10745552      | 91469729  | T | C | 0.03 | 7.85e-06 | 2.69 | 12.48 | -                                           | intergenic_variant                                                                                                                                                                                                         | 0 | 0.998 |
| 22 | rs112403136     | 29031126  | G | A | 0.97 | 7.98e-06 | 0.08 | 0.38  | TTC28                                       | intron_variant, intron_variant, non_coding_transcript_variant                                                                                                                                                              | 0 | 0.985 |

RESULTS

13

|    |             |           |   |   |      |          |      |       |                     |                                                                                                                                   |   |       |
|----|-------------|-----------|---|---|------|----------|------|-------|---------------------|-----------------------------------------------------------------------------------------------------------------------------------|---|-------|
| 17 | rs144471398 | 57547816  | G | A | 0.99 | 8.30e-06 | 0.01 | 0.17  | RP11-567L7.6        | intron_variant, non_coding_transcript_variant                                                                                     | 0 | 0.998 |
| 17 | rs60508831  | 6612682   | A | G | 0.77 | 8.54e-06 | 0.21 | 0.54  | SLC13A5             | intron_variant, intron_variant, NMD_transcript_variant, upstream_gene_variant                                                     | 0 | 0.916 |
| 8  | rs180696447 | 108436114 | G | T | 0.99 | 8.75e-06 | 0.03 | 0.27  | ANGPT1              | intron_variant                                                                                                                    | 0 | 0.996 |
| 9  | rs181096409 | 7472406   | A | G | 0.99 | 9.12e-06 | 0.01 | 0.15  | RPL4P5              | downstream_gene_variant                                                                                                           | 0 | 0.997 |
| 11 | rs77876049  | 122936811 | G | A | 0.95 | 9.14e-06 | 0.14 | 0.46  | HSPA8               | upstream_gene_variant                                                                                                             | 0 | 0.999 |
| 2  | rs150163435 | 225106755 | C | T | 0.99 | 9.32e-06 | 0.01 | 0.15  | AC104802.1          | upstream_gene_variant                                                                                                             | 0 | 0.997 |
| 3  | rs2361350   | 57764197  | A | G | 0.09 | 9.55e-06 | 1.99 | 5.88  | SLMAP, -            | intron_variant, non_coding_transcript_variant, intron_variant, regulatory_region_variant                                          | 0 | 0.999 |
| 1  | rs190886391 | 106605878 | T | A | 0.99 | 9.80e-06 | 0.01 | 0.18  | -                   | intergenic_variant                                                                                                                | 0 | 0.997 |
| 7  | rs4098926   | 33511328  | A | C | 0.99 | 3.35e-07 | 0.00 | 0.06  | BBS9, -             | intron_variant, intron_variant, NMD_transcript_variant, regulatory_region_variant                                                 | 0 | 0.996 |
| 3  | rs181832941 | 189567428 | T | C | 1.00 | 3.65e-07 | 0.00 | 0.06  | TP63                | intron_variant, intron_variant, non_coding_transcript_variant                                                                     | 0 | 0.998 |
| 18 | rs140914711 | 41414229  | T | C | 0.98 | 4.07e-07 | 0.01 | 0.13  | RNU6-443P           | upstream_gene_variant                                                                                                             | 0 | 0.993 |
| 14 | rs188208602 | 98385236  | C | T | 0.99 | 4.98e-07 | 0.00 | 0.06  | -                   | intergenic_variant                                                                                                                | 0 | 0.999 |
| 1  | rs192540202 | 237511541 | C | G | 0.99 | 6.33e-07 | 0.00 | 0.08  | RYR2                | intron_variant                                                                                                                    | 0 | 0.996 |
| 11 | rs72982705  | 103566801 | C | A | 0.89 | 7.49e-07 | 0.04 | 0.26  | RP11-563P16.1       | intron_variant, non_coding_transcript_variant                                                                                     | 0 | 0.997 |
| 2  | rs4241192   | 197794166 | G | T | 0.10 | 1.13e-06 | 3.52 | 18.89 | PGAP1               | upstream_gene_variant                                                                                                             | 0 | 0.994 |
| 5  | rs147719528 | 165130442 | T | A | 0.99 | 1.19e-06 | 0.00 | 0.07  | CTC-535M15.2        | intron_variant, non_coding_transcript_variant                                                                                     | 0 | 0.997 |
| 13 | rs186592710 | 68901484  | A | T | 0.99 | 1.46e-06 | 0.01 | 0.13  | RPL37P21            | downstream_gene_variant                                                                                                           | 0 | 0.994 |
| 2  | rs150728297 | 144599994 | A | G | 0.99 | 1.56e-06 | 0.01 | 0.11  | -                   | regulatory_region_variant, intergenic_variant                                                                                     | 0 | 0.999 |
| 4  | rs148632338 | 156047536 | C | T | 0.99 | 1.65e-06 | 0.00 | 0.10  | -                   | intergenic_variant                                                                                                                | 0 | 0.997 |
| 12 | rs117277472 | 52793574  | C | T | 0.99 | 1.93e-06 | 0.00 | 0.07  | KRT82, RP3-416H24.4 | intron_variant, intron_variant, non_coding_transcript_variant                                                                     | 0 | 0.998 |
| 1  | rs187653925 | 209939702 | A | G | 0.99 | 2.02e-06 | 0.00 | 0.08  | TRAF3IP3, -         | intron_variant, upstream_gene_variant, downstream_gene_variant, intron_variant, NMD_transcript_variant, regulatory_region_variant | 0 | 0.996 |
| 2  | rs75236429  | 755099    | A | T | 0.95 | 2.33e-06 | 0.03 | 0.25  | -                   | intergenic_variant                                                                                                                | 0 | 0.988 |
| 11 | rs111451843 | 85833109  | C | G | 0.98 | 2.33e-06 | 0.01 | 0.16  | -                   | intergenic_variant                                                                                                                | 0 | 0.995 |
| 4  | rs181248603 | 173255832 | T | A | 0.99 | 2.50e-06 | 0.00 | 0.09  | GALNTL6             | intron_variant, non_coding_transcript_variant, intron_variant                                                                     | 0 | 0.995 |
| 3  | rs75169866  | 15819505  | T | C | 0.97 | 2.57e-06 | 0.02 | 0.19  | ANKRD28             | downstream_gene_variant, intron_variant, NMD_transcript_variant, intron_variant, intron_variant, non_coding_transcript_variant    | 0 | 0.989 |

10

Results

17

8

9

11

2

3

1

7

3

18

14

1

11

2

5

13

2

4

12

1

2

11

4

3

2

11

4

3

2

11

4

3

2

11

4

3

2

11

4

|    |                |           |   |   |      |          |      |        |                           |                                                                                                                       |   |       |
|----|----------------|-----------|---|---|------|----------|------|--------|---------------------------|-----------------------------------------------------------------------------------------------------------------------|---|-------|
| 10 | rs184966137    | 32249822  | C | G | 1.00 | 6.98e-06 | 0.00 | 0.04   | -                         | intergenic_variant                                                                                                    | 0 | 1     |
| 4  | rs185049893    | 168087142 | A | T | 0.99 | 7.31e-06 | 0.01 | 0.13   | SPOCK3                    | intron_variant, NMD_transcript_variant, intron_variant                                                                | 0 | 0.999 |
| 17 | chr17:56290388 | 56290388  | G | A | 0.99 | 7.66e-06 | 0.00 | 0.10   | MKS1                      | 3_prime_UTR_variant, NMD_transcript_variant, synonymous_variant, downstream_gene_variant, upstream_gene_variant       | 0 | 0.997 |
| 7  | rs117667567    | 143726583 | G | T | 0.99 | 7.87e-06 | 0.01 | 0.15   | -                         | intergenic_variant                                                                                                    | 0 | 0.995 |
| 4  | rs114088559    | 90610327  | C | T | 0.98 | 8.02e-06 | 0.02 | 0.20   | RP11-115D19.1             | intron_variant, non_coding_transcript_variant                                                                         | 0 | 0.99  |
| 12 | rs183935240    | 127197180 | G | A | 0.99 | 8.04e-06 | 0.00 | 0.10   | -                         | intergenic_variant                                                                                                    | 0 | 0.998 |
| 4  | rs114487955    | 16238359  | G | A | 0.99 | 8.11e-06 | 0.00 | 0.12   | TAPT1-AS1                 | intron_variant, non_coding_transcript_variant                                                                         | 0 | 0.996 |
| 4  | rs141146865    | 66228168  | T | A | 1.00 | 8.21e-06 | 0.00 | 0.03   | EPHA5                     | intron_variant                                                                                                        | 0 | 1     |
| 11 | rs609423       | 84705414  | T | A | 0.01 | 8.26e-06 | 8.26 | 220.30 | DLG2, AP000857.2          | intron_variant, downstream_gene_variant                                                                               | 0 | 0.998 |
| 9  | rs142825270    | 72022683  | T | A | 0.97 | 8.38e-06 | 0.02 | 0.22   | -                         | intergenic_variant                                                                                                    | 0 | 0.984 |
| 11 | rs73494848     | 75159877  | C | T | 1.00 | 8.64e-06 | 0.00 | 0.07   | GDPD5                     | intron_variant, intron_variant, NMD_transcript_variant, intron_variant, non_coding_transcript_variant                 | 0 | 0.998 |
| 19 | chr19:58952327 | 58952327  | A | G | 1.00 | 8.92e-06 | 0.00 | 0.04   | ZNF132, CTD-2619J13.19, - | upstream_gene_variant, non_coding_transcript_exon_variant, 2 non_coding_transcript_variant, regulatory_region_variant | 1 | 1     |
| 2  | rs7556839      | 217167604 | A | G | 1.00 | 8.96e-06 | 0.00 | 0.07   | AC069155.1, MARCH4        | upstream_gene_variant, intron_variant                                                                                 | 0 | 1     |
| 15 | rs117591562    | 79625213  | T | C | 0.99 | 9.02e-06 | 0.01 | 0.13   | TMED3, -                  | intron_variant, regulatory_region_variant                                                                             | 0 | 0.997 |

10 RESULTS

## Not adjusted to all other outcomes

| CHR | SNP            | BP        | A1 | A2 | FRQ  | P        | OR_L95 | OR_U95 | gene                       | conseq                                                                                                       | genotyped | impute2.info |
|-----|----------------|-----------|----|----|------|----------|--------|--------|----------------------------|--------------------------------------------------------------------------------------------------------------|-----------|--------------|
| 7   | rs17512172     | 121198154 | T  | A  | 0.67 | 4.94e-07 | 0.46   | 0.71   | -                          | intergenic_variant                                                                                           | 0         | 0.997        |
| 13  | rs9563027      | 51708406  | T  | C  | 0.69 | 1.58e-06 | 0.46   | 0.72   | LINC00371                  | intron_variant, non_coding_transcript_variant                                                                | 0         | 0.978        |
| 7   | rs1469640      | 42535390  | C  | T  | 0.34 | 1.87e-06 | 1.36   | 2.10   | -                          | intergenic_variant                                                                                           | 0         | 0.998        |
| 3   | rs115155878    | 114055988 | A  | C  | 0.97 | 2.31e-06 | 0.12   | 0.42   | ZBTB20                     | downstream_gene_variant                                                                                      | 0         | 0.991        |
| 2   | rs7557600      | 48772202  | T  | C  | 0.83 | 2.74e-06 | 0.39   | 0.68   | STON1, STON1-GTF2A1L, -    | intron_variant, regulatory_region_variant                                                                    | 0         | 0.991        |
| 14  | rs150956       | 70530706  | C  | G  | 0.31 | 3.57e-06 | 0.42   | 0.70   | SLC8A3                     | intron_variant, intron_variant, NMD_transcript_variant, upstream_gene_variant                                | 0         | 0.948        |
| 13  | rs1974039      | 48475331  | G  | A  | 0.61 | 5.98e-06 | 0.49   | 0.75   | LINC00444                  | downstream_gene_variant                                                                                      | 0         | 0.998        |
| 3   | rs2661405      | 21358636  | G  | C  | 0.82 | 7.71e-06 | 0.44   | 0.72   | -                          | intergenic_variant                                                                                           | 0         | 0.995        |
| 8   | rs58527822     | 134785991 | C  | T  | 0.92 | 9.26e-06 | 0.30   | 0.63   | CTD-2588J1.1, CTD-2309H9.3 | intron_variant, non_coding_transcript_variant, downstream_gene_variant                                       | 0         | 0.971        |
| 10  | rs7069375      | 121096445 | A  | G  | 0.41 | 9.52e-06 | 1.33   | 2.10   | RP11-79M19.2, GRK5, -      | upstream_gene_variant, intron_variant, regulatory_region_variant                                             | 0         | 0.916        |
| 20  | rs200890       | 1792089   | C  | T  | 0.44 | 1.19e-06 | 1.33   | 1.95   | RP5-968J1.1                | intron_variant, non_coding_transcript_variant                                                                | 0         | 0.955        |
| 2   | rs116266836    | 155376909 | A  | G  | 0.96 | 4.17e-06 | 0.19   | 0.51   | -                          | intergenic_variant                                                                                           | 0         | 0.994        |
| 8   | rs4732926      | 29185969  | T  | C  | 0.82 | 5.53e-06 | 0.47   | 0.74   | DUSP4                      | downstream_gene_variant                                                                                      | 0         | 0.993        |
| 1   | rs74081211     | 68642240  | A  | G  | 0.86 | 6.25e-06 | 0.41   | 0.70   | WLS, GNG12-AS1             | intron_variant, non_coding_transcript_variant, intron_variant, NMD_transcript_variant, upstream_gene_variant | 0         | 0.966        |
| 1   | rs2761065      | 30625707  | A  | G  | 0.29 | 8.94e-06 | 1.28   | 1.89   | -                          | intergenic_variant                                                                                           | 0         | 0.997        |
| 5   | rs10051505     | 105009840 | T  | C  | 0.92 | 5.98e-07 | 0.15   | 0.43   | -                          | intergenic_variant                                                                                           | 0         | 0.975        |
| 2   | rs12614005     | 65943823  | C  | G  | 0.55 | 1.53e-06 | 0.34   | 0.64   | AC074391.1                 | intron_variant, non_coding_transcript_variant                                                                | 0         | 0.952        |
| 4   | chr4:142710442 | 142710442 | C  | A  | 0.70 | 3.01e-06 | 1.65   | 3.38   | -                          | intergenic_variant                                                                                           | 2         | 1            |
| 14  | rs73591732     | 27448446  | T  | C  | 0.90 | 3.01e-06 | 0.23   | 0.55   | RP11-384J4.2               | intron_variant, non_coding_transcript_variant                                                                | 0         | 0.998        |
| 14  | rs188623516    | 46926170  | T  | A  | 0.99 | 4.76e-06 | 0.00   | 0.11   | LINC00871                  | intron_variant, non_coding_transcript_variant                                                                | 0         | 0.998        |
| 17  | rs4362428      | 2090341   | C  | A  | 0.60 | 5.26e-06 | 0.37   | 0.67   | SMG6                       | intron_variant                                                                                               | 0         | 0.997        |
| 1   | rs74634803     | 156207690 | G  | C  | 0.99 | 6.57e-06 | 0.03   | 0.25   | PMF1, PMF1-BGLAP, BGLAP    | intron_variant, downstream_gene_variant, intron_variant, NMD_transcript_variant, upstream_gene_variant       | 0         | 0.993        |
| 12  | rs117172146    | 126553783 | C  | T  | 0.99 | 6.74e-06 | 0.03   | 0.25   | -                          | intergenic_variant                                                                                           | 0         | 0.994        |
| 1   | rs180991369    | 61102621  | G  | A  | 0.97 | 8.53e-06 | 0.08   | 0.37   | RP11-776H12.1              | intron_variant, non_coding_transcript_variant                                                                | 0         | 0.987        |
| 16  | rs9922610      | 76512728  | G  | A  | 0.99 | 8.57e-06 | 0.01   | 0.19   | CNTNAP4                    | intron_variant, non_coding_transcript_variant, intron_variant                                                | 0         | 1            |

|    |               |           |   |   |      |          |      |      |                             |                                                                                                       |   |       |
|----|---------------|-----------|---|---|------|----------|------|------|-----------------------------|-------------------------------------------------------------------------------------------------------|---|-------|
| 13 | rs6650325     | 95953289  | C | A | 0.41 | 9.43e-06 | 0.32 | 0.64 | ABCC4, -                    | intron_variant, regulatory_region_variant                                                             | 0 | 0.984 |
| 4  | rs10015432    | 166855253 | T | C | 0.90 | 9.49e-06 | 0.22 | 0.55 | TLL1                        | intron_variant, intron_variant, NMD_transcript_variant                                                | 0 | 0.957 |
| 11 | rs150655300   | 118731132 | A | G | 0.99 | 9.51e-06 | 0.03 | 0.26 | -                           | intergenic_variant                                                                                    | 0 | 0.997 |
| 8  | rs13281094    | 124741789 | T | C | 0.64 | 9.52e-06 | 0.36 | 0.67 | ANXA13, -                   | upstream_gene_variant, intron_variant, regulatory_region_variant                                      | 0 | 0.984 |
| 19 | rs192196148   | 51983352  | G | C | 1.00 | 9.93e-06 | 0.00 | 0.09 | CEACAM18, -                 | intron_variant, regulatory_region_variant                                                             | 0 | 0.999 |
| 8  | rs140012666   | 79131942  | G | A | 0.99 | 1.59e-07 | 0.05 | 0.25 | -                           | intergenic_variant                                                                                    | 0 | 0.995 |
| 6  | rs144756202   | 122373287 | A | G | 0.98 | 3.31e-07 | 0.08 | 0.32 | -                           | intergenic_variant                                                                                    | 0 | 0.989 |
| 8  | chr8:49753613 | 49753613  | A | C | 0.96 | 4.65e-07 | 0.13 | 0.41 | -                           | intergenic_variant                                                                                    | 2 | 1     |
| 7  | rs9690969     | 40541259  | T | C | 0.82 | 4.70e-07 | 0.30 | 0.59 | SUGCT                       | intron_variant, downstream_gene_variant                                                               | 0 | 0.997 |
| 3  | rs727476      | 60316417  | G | T | 0.53 | 1.53e-06 | 0.34 | 0.63 | FHIT                        | intron_variant                                                                                        | 0 | 0.994 |
| 12 | rs6538067     | 87650216  | G | T | 0.12 | 1.98e-06 | 1.75 | 3.80 | -                           | intergenic_variant                                                                                    | 0 | 0.988 |
| 16 | rs17750019    | 83277510  | A | G | 0.90 | 2.08e-06 | 0.23 | 0.55 | CDH13                       | intron_variant, NMD_transcript_variant, intron_variant, intron_variant, non_coding_transcript_variant | 0 | 0.977 |
| 7  | rs74476624    | 67956247  | G | C | 0.97 | 2.84e-06 | 0.12 | 0.41 | -                           | intergenic_variant                                                                                    | 0 | 0.996 |
| 6  | rs193051711   | 82737197  | C | T | 0.99 | 3.17e-06 | 0.02 | 0.20 | -                           | intergenic_variant                                                                                    | 0 | 0.999 |
| 18 | rs79164706    | 61879513  | G | A | 0.97 | 4.41e-06 | 0.14 | 0.45 | RP11-909B2.1, RP11-146N18.1 | downstream_gene_variant, intron_variant, non_coding_transcript_variant                                | 0 | 0.997 |
| 15 | rs191166845   | 87015139  | T | C | 0.99 | 4.52e-06 | 0.04 | 0.27 | AGBL1                       | intron_variant                                                                                        | 0 | 0.999 |
| 2  | rs112604225   | 53667670  | A | G | 0.96 | 4.68e-06 | 0.15 | 0.46 | -                           | intergenic_variant                                                                                    | 0 | 0.984 |
| 10 | rs76136730    | 125064878 | C | G | 0.99 | 5.65e-06 | 0.04 | 0.28 | -                           | regulatory_region_variant, intergenic_variant                                                         | 0 | 0.996 |
| 8  | rs72678069    | 116412922 | A | G | 0.96 | 6.08e-06 | 0.15 | 0.48 | -                           | intergenic_variant                                                                                    | 0 | 0.99  |
| 9  | rs4744652     | 74639028  | T | C | 0.15 | 6.24e-06 | 1.58 | 3.18 | -                           | intergenic_variant                                                                                    | 0 | 0.995 |
| 9  | rs4298578     | 22834741  | T | A | 0.97 | 7.69e-06 | 0.14 | 0.46 | -                           | intergenic_variant                                                                                    | 0 | 0.995 |
| 1  | rs115246628   | 183787321 | C | T | 1.00 | 8.03e-06 | 0.01 | 0.15 | RGL1                        | intron_variant                                                                                        | 0 | 0.998 |
| 3  | rs77501676    | 59290744  | T | C | 1.00 | 8.05e-06 | 0.01 | 0.14 | -                           | intergenic_variant                                                                                    | 0 | 1     |
| 16 | rs117092646   | 85199964  | A | G | 0.98 | 8.07e-06 | 0.10 | 0.41 | CTC-786C10.1                | upstream_gene_variant                                                                                 | 0 | 0.996 |
| 11 | rs2085874     | 37216930  | G | A | 0.96 | 9.93e-06 | 0.15 | 0.48 | -                           | intergenic_variant                                                                                    | 0 | 0.989 |
| 3  | rs75648358    | 62738642  | T | C | 0.92 | 1.61e-07 | 0.14 | 0.40 | CADPS                       | intron_variant                                                                                        | 0 | 0.976 |
| 11 | rs139967808   | 4503396   | G | A | 0.99 | 2.79e-07 | 0.01 | 0.14 | -                           | regulatory_region_variant, intergenic_variant                                                         | 0 | 0.997 |
| 8  | rs143497687   | 1256659   | T | C | 0.99 | 3.50e-07 | 0.01 | 0.15 | -                           | intergenic_variant                                                                                    | 0 | 0.998 |
| 2  | rs184936958   | 224157963 | C | T | 1.00 | 3.89e-07 | 0.00 | 0.07 | -                           | intergenic_variant                                                                                    | 0 | 0.999 |
| 5  | rs145487482   | 56173745  | T | C | 0.99 | 4.57e-07 | 0.01 | 0.15 | MAP3K1                      | intron_variant                                                                                        | 0 | 0.997 |
| 6  | rs2432788     | 5394848   | A | G | 0.98 | 4.95e-07 | 0.06 | 0.30 | FARS2                       | intron_variant                                                                                        | 0 | 0.999 |
| 1  | rs72654815    | 21354625  | G | A | 0.97 | 7.00e-07 | 0.07 | 0.30 | EIF4G3, -                   | intron_variant, regulatory_region_variant                                                             | 0 | 0.987 |

RESULTS

|    |             |           |   |   |      |          |      |      |                      |                                                                                                       |   |       |
|----|-------------|-----------|---|---|------|----------|------|------|----------------------|-------------------------------------------------------------------------------------------------------|---|-------|
| 15 | rs6494317   | 62506361  | A | C | 0.48 | 8.28e-07 | 1.97 | 4.76 | -                    | intergenic_variant                                                                                    | 0 | 0.939 |
| 5  | rs145762412 | 152739188 | T | A | 0.99 | 1.96e-06 | 0.02 | 0.18 | -                    | intergenic_variant                                                                                    | 0 | 0.997 |
| 3  | rs11705701  | 185544309 | G | A | 0.57 | 2.00e-06 | 0.25 | 0.56 | IGF2BP2, -           | upstream_gene_variant, regulatory_region_variant                                                      | 0 | 0.979 |
| 7  | rs117208670 | 77885127  | T | C | 0.98 | 2.09e-06 | 0.05 | 0.28 | MAGI2                | 3_prime_UTR_variant, intron_variant, non_coding_transcript_variant, intron_variant                    | 0 | 0.994 |
| 1  | rs74934992  | 191255088 | G | T | 0.97 | 2.14e-06 | 0.08 | 0.36 | -                    | intergenic_variant                                                                                    | 0 | 0.99  |
| 12 | rs34400042  | 11746635  | G | A | 0.83 | 2.62e-06 | 0.21 | 0.53 | RP11-434C1.1         | downstream_gene_variant                                                                               | 0 | 0.98  |
| 5  | rs13153499  | 11272680  | A | G | 0.97 | 2.74e-06 | 0.09 | 0.37 | CTNND2               | intron_variant, intron_variant, NMD_transcript_variant, intron_variant, non_coding_transcript_variant | 0 | 0.994 |
| 8  | rs189437718 | 134655419 | A | G | 0.99 | 2.91e-06 | 0.02 | 0.21 | SNORA40              | downstream_gene_variant                                                                               | 0 | 0.996 |
| 13 | rs8002278   | 106137154 | C | T | 0.42 | 2.94e-06 | 1.74 | 3.83 | DAOA, DAOA-AS1       | intron_variant, NMD_transcript_variant, intron_variant, intron_variant, non_coding_transcript_variant | 0 | 0.99  |
| 5  | rs189159983 | 161161144 | A | G | 0.99 | 3.29e-06 | 0.03 | 0.25 | -                    | intergenic_variant                                                                                    | 0 | 0.996 |
| 1  | rs76487613  | 72134192  | T | A | 0.99 | 3.47e-06 | 0.04 | 0.26 | NEGR1, -             | intron_variant, regulatory_region_variant                                                             | 0 | 0.996 |
| 16 | rs78064607  | 71723181  | C | T | 0.99 | 3.72e-06 | 0.01 | 0.17 | PHLPP2               | intron_variant, intron_variant, non_coding_transcript_variant, upstream_gene_variant                  | 0 | 0.997 |
| 11 | rs7110822   | 131329729 | T | C | 0.99 | 3.77e-06 | 0.01 | 0.16 | NTM                  | intron_variant, non_coding_transcript_variant, intron_variant                                         | 0 | 0.997 |
| 16 | rs140961631 | 72374645  | T | A | 0.98 | 3.84e-06 | 0.05 | 0.31 | -                    | intergenic_variant                                                                                    | 0 | 0.996 |
| 6  | rs58258587  | 114638966 | C | T | 0.94 | 3.86e-06 | 0.14 | 0.45 | HS3ST5, RP3-399L15.3 | intron_variant, intron_variant, non_coding_transcript_variant                                         | 0 | 0.978 |
| 5  | rs115638059 | 154003646 | G | T | 0.99 | 6.63e-06 | 0.04 | 0.27 | -                    | intergenic_variant                                                                                    | 0 | 0.996 |
| 10 | rs188495776 | 55081033  | G | A | 0.99 | 6.64e-06 | 0.01 | 0.18 | -                    | intergenic_variant                                                                                    | 0 | 1     |
| 7  | rs57149599  | 37961856  | A | G | 0.97 | 6.67e-06 | 0.07 | 0.34 | EPDR1, SFRP4, -      | intron_variant, regulatory_region_variant                                                             | 0 | 0.992 |
| 12 | rs10745552  | 91469729  | T | C | 0.03 | 6.68e-06 | 2.43 | 9.43 | -                    | intergenic_variant                                                                                    | 0 | 0.998 |
| 1  | rs6697616   | 216636950 | A | T | 0.44 | 7.49e-06 | 1.68 | 3.72 | -                    | regulatory_region_variant, intergenic_variant                                                         | 0 | 0.989 |
| 2  | rs187863579 | 183988127 | A | G | 0.99 | 7.54e-06 | 0.03 | 0.26 | NUP35                | intron_variant, upstream_gene_variant, downstream_gene_variant                                        | 0 | 0.995 |
| 5  | rs149963055 | 152479292 | G | A | 0.99 | 7.77e-06 | 0.02 | 0.22 | AC091969.1           | intron_variant, non_coding_transcript_variant                                                         | 0 | 0.997 |
| 7  | rs10244850  | 43304193  | T | C | 1.00 | 8.71e-06 | 0.00 | 0.11 | HECW1                | intron_variant, non_coding_transcript_variant, intron_variant                                         | 0 | 0.998 |
| 16 | rs8054506   | 50016562  | T | C | 0.67 | 9.33e-06 | 2.03 | 6.15 | -                    | intergenic_variant                                                                                    | 0 | 0.895 |
| 1  | rs11161839  | 86991815  | C | A | 0.87 | 9.35e-06 | 0.21 | 0.55 | -                    | intergenic_variant                                                                                    | 0 | 0.98  |
| 2  | rs146107308 | 80562716  | G | A | 0.99 | 9.36e-06 | 0.04 | 0.28 | CTNNA2               | intron_variant, intron_variant, non_coding_transcript_variant                                         | 0 | 0.998 |

19 RESULTS

10

|    |               |           |   |   |      |          |      |      |                                                  |                                                                                          |   |       |
|----|---------------|-----------|---|---|------|----------|------|------|--------------------------------------------------|------------------------------------------------------------------------------------------|---|-------|
| 8  | rs143062081   | 26797906  | G | A | 0.98 | 9.41e-06 | 0.06 | 0.34 | -                                                | intergenic_variant                                                                       | 0 | 0.988 |
| 2  | rs150728297   | 144599994 | A | G | 0.99 | 6.01e-08 | 0.01 | 0.11 | -                                                | regulatory_region_variant, intergenic_variant                                            | 0 | 0.999 |
| 5  | rs12153771    | 63106169  | G | A | 0.95 | 3.79e-07 | 0.04 | 0.23 | -                                                | intergenic_variant                                                                       | 0 | 0.979 |
| 7  | rs4730800     | 117373534 | A | T | 0.99 | 4.10e-07 | 0.01 | 0.10 | CTTNBP2                                          | downstream_gene_variant, intron_variant, intron_variant, NMD_transcript_variant          | 0 | 0.996 |
| 1  | rs192540202   | 237511541 | C | G | 0.99 | 4.49e-07 | 0.01 | 0.10 | RYR2                                             | intron_variant                                                                           | 0 | 0.996 |
| 8  | chr8:97892119 | 97892119  | G | A | 0.99 | 4.75e-07 | 0.01 | 0.12 | CPQ                                              | missense_variant                                                                         | 2 | 1     |
| 18 | rs140914711   | 41414229  | T | C | 0.98 | 6.56e-07 | 0.02 | 0.19 | RNU6-443P                                        | upstream_gene_variant                                                                    | 0 | 0.993 |
| 11 | rs146495243   | 64886310  | C | T | 0.99 | 6.69e-07 | 0.02 | 0.16 | MRPL49, FAU, TM7SF2, ZN-HIT2, SYVN1, AP003068.12 | upstream_gene_variant, downstream_gene_variant                                           | 0 | 0.998 |
| 12 | rs144415411   | 90377606  | G | A | 1.00 | 1.14e-06 | 0.00 | 0.09 | RP11-654D12.2                                    | intron_variant, non_coding_transcript_variant                                            | 0 | 0.999 |
| 1  | rs188095292   | 246892698 | C | T | 0.99 | 1.26e-06 | 0.02 | 0.19 | SCCPDH, -                                        | intron_variant, regulatory_region_variant                                                | 0 | 0.995 |
| 3  | rs6788430     | 42505962  | T | C | 0.99 | 1.36e-06 | 0.01 | 0.11 | -                                                | intergenic_variant                                                                       | 0 | 0.998 |
| 7  | rs12670163    | 55293011  | A | G | 1.00 | 1.55e-06 | 0.01 | 0.11 | EGFR                                             | intron_variant                                                                           | 0 | 0.999 |
| 2  | rs72868355    | 37048367  | C | G | 0.99 | 1.70e-06 | 0.02 | 0.20 | -                                                | intergenic_variant                                                                       | 0 | 0.998 |
| 1  | rs116255984   | 246634974 | G | A | 0.99 | 1.71e-06 | 0.01 | 0.13 | SMYD3                                            | intron_variant, non_coding_transcript_variant, intron_variant                            | 0 | 0.997 |
| 1  | rs140789420   | 169845576 | C | T | 1.00 | 1.87e-06 | 0.00 | 0.08 | SCYL3                                            | intron_variant, intron_variant, non_coding_transcript_variant                            | 0 | 0.999 |
| 4  | rs114088559   | 90610327  | C | T | 0.98 | 1.98e-06 | 0.02 | 0.21 | RP11-115D19.1                                    | intron_variant, non_coding_transcript_variant                                            | 0 | 0.99  |
| 2  | rs2163050     | 41826738  | G | A | 0.85 | 2.18e-06 | 0.11 | 0.39 | AC010739.1                                       | downstream_gene_variant                                                                  | 0 | 0.989 |
| 11 | rs189508277   | 32271897  | G | A | 0.99 | 2.20e-06 | 0.01 | 0.15 | RP1-65P5.1                                       | intron_variant, non_coding_transcript_variant                                            | 0 | 0.995 |
| 12 | rs181634788   | 90788710  | C | T | 0.99 | 2.51e-06 | 0.00 | 0.10 | -                                                | intergenic_variant                                                                       | 0 | 0.997 |
| 20 | rs76449538    | 24111259  | T | C | 0.98 | 2.51e-06 | 0.03 | 0.23 | -                                                | intergenic_variant                                                                       | 0 | 0.998 |
| 6  | rs13213508    | 6152555   | G | A | 0.94 | 2.55e-06 | 0.08 | 0.35 | F13A1                                            | intron_variant                                                                           | 0 | 0.999 |
| 7  | rs7794878     | 78080244  | A | G | 0.86 | 2.66e-06 | 0.12 | 0.41 | MAGI2, -                                         | intron_variant, intron_variant, non_coding_transcript_variant, regulatory_region_variant | 0 | 0.999 |
| 8  | rs139134207   | 133066750 | C | T | 1.00 | 2.71e-06 | 0.00 | 0.08 | OC90                                             | intron_variant                                                                           | 0 | 1     |
| 8  | rs189901754   | 132632117 | G | A | 1.00 | 2.90e-06 | 0.00 | 0.08 | -                                                | intergenic_variant                                                                       | 0 | 0.998 |
| 19 | rs147472919   | 8408802   | A | G | 0.97 | 3.38e-06 | 0.04 | 0.26 | KANK3, CTD-255008.7, AC010323.1                  | upstream_gene_variant, downstream_gene_variant                                           | 0 | 0.989 |
| 9  | rs10811524    | 21283847  | T | A | 0.80 | 4.45e-06 | 0.11 | 0.41 | -                                                | intergenic_variant                                                                       | 0 | 0.975 |

10  
Results

11

|    |                |           |   |   |      |          |      |      |                                          |                                                                                                                                                                                                                     |   |       |
|----|----------------|-----------|---|---|------|----------|------|------|------------------------------------------|---------------------------------------------------------------------------------------------------------------------------------------------------------------------------------------------------------------------|---|-------|
| 3  | rs182573978    | 108804875 | G | A | 1.00 | 4.56e-06 | 0.00 | 0.12 | MORC1                                    | intron_variant                                                                                                                                                                                                      | 0 | 0.998 |
| 12 | rs117624293    | 95438785  | G | C | 0.95 | 4.74e-06 | 0.06 | 0.33 | NR2C1                                    | upstream_gene_variant, down-<br>stream_gene_variant, intron_variant, intron_variant,<br>non_coding_transcript_variant, intron_variant,<br>NMD_transcript_variant                                                    | 0 | 0.985 |
| 1  | rs182819833    | 226681975 | C | A | 1.00 | 5.03e-06 | 0.00 | 0.09 | CDKN2AIPNL1                              | upstream_gene_variant                                                                                                                                                                                               | 0 | 1     |
| 3  | rs181832941    | 189567428 | T | C | 1.00 | 5.36e-06 | 0.01 | 0.13 | TP63                                     | intron_variant, intron_variant,                                                                                                                                                                                     | 0 | 0.998 |
| 14 | rs143247799    | 25100109  | C | T | 0.99 | 5.51e-06 | 0.00 | 0.11 | RP11-104E19.1,<br>GZMB, -                | non_coding_transcript_variant<br>intron_variant, non_coding_transcript_variant, down-<br>stream_gene_variant, regulatory_region_variant                                                                             | 0 | 0.998 |
| 4  | rs73210745     | 5942961   | A | C | 0.79 | 5.95e-06 | 0.10 | 0.40 | -                                        | intergenic_variant                                                                                                                                                                                                  | 0 | 0.94  |
| 11 | rs11033029     | 35240076  | A | C | 0.87 | 6.01e-06 | 0.10 | 0.40 | RP1-68D18.2,<br>CD44, RP1-<br>68D18.4, - | downstream_gene_variant, intron_variant, intron_variant,<br>non_coding_transcript_variant, upstream_gene_variant,<br>intron_variant, NMD_transcript_variant, regula-<br>tory_region_variant                         | 0 | 0.977 |
| 9  | rs191216752    | 111308811 | C | G | 1.00 | 6.01e-06 | 0.00 | 0.11 | -                                        | intergenic_variant                                                                                                                                                                                                  | 0 | 0.998 |
| 7  | rs79995619     | 33541130  | A | G | 0.99 | 6.48e-06 | 0.01 | 0.18 | BBS9, -                                  | intron_variant, upstream_gene_variant, intron_variant,<br>NMD_transcript_variant, regulatory_region_variant                                                                                                         | 0 | 0.996 |
| 14 | rs188208602    | 98385236  | C | T | 0.99 | 6.74e-06 | 0.01 | 0.13 | -                                        | intergenic_variant                                                                                                                                                                                                  | 0 | 0.999 |
| 4  | rs148632338    | 156047536 | C | T | 0.99 | 7.39e-06 | 0.01 | 0.16 | -                                        | intergenic_variant                                                                                                                                                                                                  | 0 | 0.997 |
| 8  | rs187288337    | 58939051  | C | T | 0.99 | 7.43e-06 | 0.01 | 0.13 | FAM110B, RP11-<br>1112C15.2              | intron_variant, non_coding_transcript_variant, in-<br>tron_variant, downstream_gene_variant                                                                                                                         | 0 | 0.998 |
| 12 | rs187329208    | 128727850 | C | T | 1.00 | 7.66e-06 | 0.00 | 0.01 | MIR4419B                                 | upstream_gene_variant                                                                                                                                                                                               | 0 | 1     |
| 10 | rs184497072    | 23252404  | A | T | 1.00 | 7.67e-06 | 0.00 | 0.05 | ARMC3                                    | intron_variant, non_coding_transcript_variant, down-<br>stream_gene_variant, intron_variant                                                                                                                         | 0 | 0.999 |
| 14 | chr14:24799164 | 24799164  | G | T | 1.00 | 7.77e-06 | 0.00 | 0.12 | ADCY4, RP11-<br>934B9.3, -               | upstream_gene_variant, missense_variant, down-<br>stream_gene_variant, non_coding_transcript_exon_variant,<br>non_coding_transcript_variant, missense_variant,<br>NMD_transcript_variant, regulatory_region_variant | 2 | 1     |
| 9  | rs72733349     | 102987266 | A | C | 0.83 | 7.80e-06 | 0.10 | 0.41 | INVS                                     | intron_variant, non_coding_transcript_variant, in-<br>tron_variant                                                                                                                                                  | 0 | 0.961 |
| 12 | rs183138047    | 51548306  | A | C | 1.00 | 8.49e-06 | 0.00 | 0.13 | TFCP2, Y_RNA                             | intron_variant, downstream_gene_variant                                                                                                                                                                             | 0 | 0.999 |
| 1  | rs12136490     | 230864486 | G | T | 0.98 | 8.82e-06 | 0.03 | 0.25 | RP11-99J16_A.2,<br>RN7SL467P, -          | intron_variant, non_coding_transcript_variant, up-<br>stream_gene_variant, regulatory_region_variant                                                                                                                | 0 | 0.998 |

10 RESULTS

112

|    |             |           |   |   |      |          |      |       |                          |                                                                                                                                      |   |       |
|----|-------------|-----------|---|---|------|----------|------|-------|--------------------------|--------------------------------------------------------------------------------------------------------------------------------------|---|-------|
| 3  | rs180782090 | 178167604 | G | A | 1.00 | 8.83e-06 | 0.00 | 0.09  | LINC01014, KC-           | intron_variant, non_coding_transcript_variant, in-                                                                                   | 0 | 0.996 |
| 5  | rs2471068   | 38104956  | G | A | 0.06 | 8.93e-06 | 2.96 | 16.26 | NMB2<br>CTD-2116N24.1, - | tron_variant<br>intron_variant, non_coding_transcript_variant, regula-                                                               | 0 | 0.975 |
| 7  | rs191150966 | 69983852  | G | C | 1.00 | 9.34e-06 | 0.00 | 0.11  | AUTS2                    | tory_region_variant<br>intron_variant                                                                                                | 0 | 0.999 |
| 3  | rs75169866  | 15819505  | T | C | 0.97 | 9.45e-06 | 0.04 | 0.29  | ANKRD28                  | downstream_gene_variant, intron_variant,<br>NMD_transcript_variant, intron_variant, intron_variant,<br>non_coding_transcript_variant | 0 | 0.989 |
| 10 | rs117553785 | 71209051  | G | A | 0.98 | 9.53e-06 | 0.03 | 0.25  | TSPAN15                  | upstream_gene_variant                                                                                                                | 0 | 0.987 |
